# Supplementary material for: Phosphate Petrochronology of the Belcina REE Mineralization (Ditrău Alkaline Massif, Romania)
Source: Preprints.org preprint supplement (doi:10.20944/preprints202305.0299.v1), 2023-05-05
Supplement: Supplementary file 1 [file supplementary]

## Sheet: Table S2. Xenotime-(Y) EMP data
	Table S2. Xenotime-(Y) EMP data
	Sample	1457a-01	1457a-01	1457a-02	1457a-02	1457a-03	1457a-03	1457a-05	1457a-09	1457a-09	1457b-01	1457b-02	1457b-02
	crystal/spot	03_xnt_01	03_xnt_02	02_xnt_01	02_xnt_02	02_xnt_01	02_xnt_02	01_xnt_04	03_xnt_01	03_xnt_02	02_xnt_04	02_xnt_01	02_xnt_02
	Oxide weight-%
	SiO2	0.368	0.637	0.41	0.391	0.367	0.21	0.097	0.097	0.076	0.104	0.103	0.109
	Y2O3	36.872	36.357	35.079	35.903	44.636	42.441	41.465	42.096	41.077	39.634	40.705	40.413
	SrO	0.02	0.029	0	0.006	0.013	0	0.018	0.006	0	0.013	0	0.022
	K2O	0.002	0.014	0.006	0.003	0.235	0.324	0.831	0.003	0.006	0.011	0.087	0.064
	CaO	0.705	1.036	0.713	0.435	0.015	0	0.011	0.22	0.205	0.602	0.014	0
	P2O5	34.59	34.235	34.468	34.417	35.528	34.45	35.086	35.381	35.132	35.609	33.804	33.751
	TiO2	0.023	0	0.006	0.032	0.351	0.084	0.052	0	0.01	0	0.062	0.055
	FeO	0.114	0.178	0	0	0.287	0.357	0.436	0.022	0.066	0.403	0.003	0
	Nd2O3	0.915	1.776	1.108	1.614	0.175	0.591	0.41	0.192	0.889	0.188	0.68	0.516
	Sm2O3	2.341	2.911	3.005	2.582	0.415	1.063	0.942	0.682	1.374	0.976	1.481	1.371
	Eu2O3	1.302	1.493	1.722	1.55	0.388	0.749	0.679	0.592	0.842	0.695	1.115	1.089
	Gd2O3	7.195	6.192	7.444	6.691	2.723	3.867	3.77	4.064	4.663	5.458	5.014	5.04
	Tb2O3	1.228	1.051	1.319	1.278	0.74	0.897	0.825	0.992	0.927	1.14	1.06	1.054
	Dy2O3	8.484	7.653	8.844	8.546	6.713	8.15	7.321	8.457	7.856	8.772	8.116	8.096
	Ho2O3	1.202	1.194	1.192	1.279	1.248	1.19	1.276	1.415	1.266	1.232	1.429	1.364
	Er2O3	2.727	2.95	2.762	2.778	3.506	3.162	3.351	3.174	3.016	2.955	3.152	3.163
	Tm2O3	0.188	0.177	0.163	0.279	0.252	0.137	0.225	0.199	0.199	0.254	0.304	0.21
	Yb2O3	1.32	1.635	1.171	1.287	1.87	1.699	2.005	1.491	1.597	1.507	1.626	1.765
	Lu2O3	0.614	0.518	0.558	0.531	0.585	0.645	0.441	0.479	0.616	0.648	0.519	0.515
	UO2	0	0	0	0	0	0	0	0	0	0.003	0	0
	ThO2	0.024	0.059	0	0.014	0.007	0	0.011	0.022	0.024	0.061	0.006	0.005
	PbO	0	0.002	0	0	0.001	0.001	0.005	0.009	0	0	0	0
	Total	100.235	100.098	99.977	99.624	100.066	100.023	99.258	99.605	99.85	100.269	99.28	98.603
	Age (Ma)	11	53	158	19	219	206	237	225	76	19	212	209
	± 2SD	13	548	102	67	9	20	29	14	126	39	73	14
	Sample	1457b-02	1457b-02	1457b-02	1457b-02	1457b-02	1457b-02	1457b-02	1457b-02	1457b-02	1457b-02	1457b-02	1457b-02
	crystal/spot	02_xnt_03	02_xnt_04	02_xnt_05	02_xnt_06	02_xnt_07	02_xnt_08	02_xnt_09	02_xnt_10	02_xnt_11	02_xnt_12	02_xnt_13	02_xnt_14
	Oxide weight-%
	SiO2	0.049	0.067	0.143	0.049	0.15	0.14	0.076	0.046	0.097	0.17	0.079	0.086
	Y2O3	44.817	46.117	42.184	45.147	42.71	42.552	44.603	45.022	43.748	42.12	44.294	42.285
	SrO	0.02	0.017	0.008	0	0	0.024	0	0.013	0	0	0	0
	K2O	0.019	0.012	0.044	0	0.06	0.074	0.025	0.022	0.021	0.083	0.006	0.063
	CaO	0.005	0	0	0.006	0	0.02	0	0	0.018	0	0.009	0.004
	P2O5	34.473	34.726	33.725	34.556	33.986	34.236	34.719	34.521	34.394	34.045	34.334	34.188
	TiO2	0.016	0.012	0.5	0.049	0.746	0.55	0.219	0.043	0.275	1.291	0.127	0.058
	FeO	0.007	0.007	0	0.009	0.02	0.013	0.05	0	0	0.013	0.026	0
	Nd2O3	0.18	0.127	0.362	0.144	0.515	0.425	0.22	0.19	0.291	0.596	0.216	0.545
	Sm2O3	0.41	0.324	1.076	0.454	0.996	0.969	0.487	0.536	0.737	1.136	0.609	1.042
	Eu2O3	0.377	0.302	0.816	0.367	0.714	0.789	0.401	0.366	0.636	0.775	0.49	0.792
	Gd2O3	2.637	2.195	4.203	2.431	3.801	3.881	2.521	2.567	3.301	3.978	2.9	4.007
	Tb2O3	0.687	0.689	0.892	0.634	0.801	0.857	0.647	0.665	0.79	0.87	0.765	0.877
	Dy2O3	6.957	6.419	7.461	6.321	6.742	6.957	6.227	6.427	6.822	6.888	6.502	7.27
	Ho2O3	1.414	1.302	1.318	1.417	1.241	1.266	1.36	1.432	1.314	1.173	1.37	1.203
	Er2O3	3.535	3.719	3.142	3.89	3.406	3.355	3.839	3.8	3.407	3.364	3.654	3.179
	Tm2O3	0.364	0.343	0.354	0.334	0.327	0.304	0.29	0.402	0.235	0.336	0.285	0.231
	Yb2O3	2.301	2.489	2.07	2.803	2.184	2.124	2.877	2.433	2.355	2.162	2.521	2.002
	Lu2O3	0.566	0.635	0.382	0.51	0.717	0.632	0.566	0.442	0.557	0.494	0.728	0.648
	UO2	0	0	0.003	0	0.013	0.001	0	0	0.001	0.005	0	0
	ThO2	0.009	0.005	0.012	0.008	0.009	0	0.003	0.013	0.005	0.008	0.01	0.007
	PbO	0.001	0	0	0	0	0	0	0	0.003	0.001	0	0
	Total	98.846	99.521	98.693	99.132	99.141	99.175	99.132	98.956	99.01	99.511	98.929	98.491
	Age (Ma)	210	200	239	55	230	205	214	224	197	241	5	231
	± 2SD	78	28	11	507	39	26	48	33	45	29	178	24
	Table 2. Xenotime-(Y) EMP data (continued)
	Sample	1457b-02	1457b-02	1457b-02	1457b-02	1457b-02	1457b-02	1457b-02	1457b-02	1457b-02	1457b-02	1457b-02	1457b-02
	crystal/spot	03_xnt_01	03_xnt_02	03_xnt_03	03_xnt_04	03_xnt_05	03_xnt_06	03_xnt_07	03_xnt_08	03_xnt_09	03_xnt_10	04_xnt_01	04_xnt_02
	Oxide weight-%
	SiO2	0.131	0.057	0.051	0.083	0.097	0.094	0.101	0.321	0.047	0.061	0.243	0.156
	Y2O3	39.755	44.024	43.149	40.454	45.102	40.661	41.369	40.762	44.707	42.184	42.857	41.812
	SrO	0.011	0.002	0	0.01	0	0.004	0.034	0.019	0	0	0	0
	K2O	0.057	0.013	0.02	0.032	0.028	0.051	0.057	0.061	0.01	0.039	0.04	0.046
	CaO	0	0.021	0.017	0.004	0.007	0	0.017	0	0	0.013	0.01	0.016
	P2O5	34.962	35.643	35.655	34.807	35.051	34.859	34.307	34.037	34.749	34.085	34.734	34.549
	TiO2	0.049	0.003	0.024	0.037	0.083	0.041	0.095	0.62	0.011	0.047	0.499	0.71
	FeO	0	0.027	0.014	0.007	0.018	0	0.019	0	0.02	0.051	0.018	0
	Nd2O3	0.42	0.166	0.248	0.448	0.152	0.503	0.565	0.613	0.13	0.351	0.318	0.411
	Sm2O3	1.316	0.364	0.518	1.162	0.414	1.204	1.157	1.369	0.376	0.726	0.954	1.115
	Eu2O3	1.106	0.345	0.46	1.028	0.36	0.973	0.922	1.025	0.343	1.017	0.782	0.929
	Gd2O3	5.23	2.604	3.078	4.837	2.329	4.581	4.454	4.755	2.571	4.097	4.079	4.436
	Tb2O3	1.109	0.77	0.84	1.099	0.602	0.995	0.976	0.953	0.769	1.016	0.867	0.953
	Dy2O3	8.528	7.342	7.805	8.235	6.28	7.965	8.007	7.595	7.364	9.023	7.437	7.346
	Ho2O3	1.411	1.405	1.432	1.207	1.301	1.313	1.329	1.252	1.4	1.498	1.207	1.122
	Er2O3	3.095	3.702	3.412	3.244	3.737	3.348	3.238	3.029	3.608	3.023	3.286	3.224
	Tm2O3	0.168	0.241	0.208	0.145	0.508	0.394	0.28	0.241	0.23	0.346	0.22	0.302
	Yb2O3	1.684	2.36	1.95	1.853	2.878	1.847	1.921	1.744	2.213	1.388	1.872	2.015
	Lu2O3	0.551	0.549	0.493	0.496	0.568	0.572	0.466	0.488	0.459	0.56	0.406	0.548
	UO2	0	0	0.001	0	0.003	0.002	0	0.004	0	0	0.005	0.004
	ThO2	0.008	0.004	0.007	0.006	0.007	0.009	0.004	0.005	0	0	0.004	0.004
	PbO	0	0	0	0	0.001	0	0	0.001	0.001	0	0.001	0
	Total	99.596	99.656	99.384	99.199	99.532	99.421	99.319	98.898	99.015	99.532	99.866	99.698
	Age (Ma)	228	215	3	7	208	192	1	206	194	3	194	208
	± 2SD	35	12	57	81	48	538	58	34	11	39	32	39
	Sample	1457b-02	1457b-02	1457b-02	1457b-02	1457b-02	1457b-03	1457b-03	1457b-04	1457b-04	1457b-04	1457b-04
	crystal/spot	04_xnt_03	04_xnt_04	04_xnt_05	04_xnt_06	04_xnt_07	02_xnt_01	02_xnt_02	02_xnt_01	02_xnt_02	02_xnt_03	02_xnt_04
	Oxide weight-%
	SiO2	0.056	0.183	0.044	0.067	0.113	0.086	0.136	0.044	0.087	0.074	0.22
	Y2O3	44.123	42.516	44.675	44.254	38.831	42.383	38.586	43.839	37.328	43.314	36.848
	SrO	0.016	0.008	0	0.01	0	0	0.001	0	0	0.016	0
	K2O	0	0.032	0.004	0.004	0.104	0.006	0.007	0.002	0.003	0.002	0.01
	CaO	0.004	0	0.028	0	0	0.334	0.703	0.096	0.091	0.2	0.292
	P2O5	34.891	34.63	35.802	35.564	34.614	33.296	32.86	34.566	33.303	35.083	34.105
	TiO2	0.053	0.652	0.007	0.037	0.055	0.042	0	0	0	0.002	0.026
	FeO	0	0.024	0.061	0.11	0.05	0.132	0.586	0.113	0.026	0	0
	Nd2O3	0.171	0.354	0.135	0.154	0.821	0.237	1.173	0.174	0.864	0.29	1.545
	Sm2O3	0.501	0.613	0.317	0.435	1.528	1.182	2.174	0.543	1.935	0.629	2.582
	Eu2O3	0.52	0.791	0.289	0.342	1.105	0.884	1.501	0.42	0.963	0.536	1.169
	Gd2O3	3.24	3.658	2.145	2.185	5.122	5.165	5.364	3.436	7.146	3.869	7.354
	Tb2O3	0.917	0.921	0.556	0.592	1.004	1.095	1.035	0.863	1.413	0.952	1.329
	Dy2O3	7.774	7.928	6.562	6.012	7.979	8.116	7.748	7.577	9.701	7.643	8.727
	Ho2O3	1.365	1.395	1.297	1.26	1.31	1.265	1.153	1.411	1.338	1.361	1.265
	Er2O3	3.482	3.112	3.836	3.828	2.998	3.239	2.928	3.558	2.959	3.414	2.909
	Tm2O3	0.318	0.342	0.324	0.351	0.267	0.2	0.31	0.352	0.221	0.286	0.112
	Yb2O3	2.057	1.613	2.531	3.008	1.635	1.688	1.768	1.823	1.149	1.822	1.442
	Lu2O3	0.541	0.579	0.502	0.656	0.586	0.626	0.472	0.433	0.64	0.604	0.51
	UO2	0	0.003	0	0	0	0	0	0	0.01	0	0
	ThO2	0	0	0.007	0.004	0.007	0	0	0.017	0.002	0.077	0
	PbO	0.001	0	0	0	0	0	0	0	0	0	0.004
	Total	100.03	99.354	99.126	98.877	98.142	99.985	98.508	99.276	99.193	100.177	100.457
	Age (Ma)	217	56	216	194	231	199	126	221	8	209	0
	± 2SD	391	353	810	315	100	298	276	27	75	152	617
