# Supplementary material for: Phosphate Petrochronology of the Belcina REE Mineralization (Ditrău Alkaline Massif, Romania)
Source: Preprints.org preprint supplement (doi:10.20944/preprints202305.0299.v1), 2023-05-05
Supplement: Supplementary file 2 [file Klötzli et al., 2023, Belcina Submission Minerals Table S1.xlsx]

## Sheet: Table 1. Monazite-(Ce) EMP data
	Table S1. Monazite-(Ce) EMP data
	Sample	1457a-01	1457a-01	1457a-01	1457a-01	1457a-01	1457a-01	1457a-01	1457a-01	1457a-01	1457a-01	1457a-01	1457a-01
	crystal/spot	02_mnz_1	02_mnz_2	02_mnz_3	02_mnz_4	02_mnz_5	02_mnz_6	03_mnz_1	03_mnz_2	03_mnz_3	03_mnz_4	03_mnz_5	03_mnz_6
	Oxide weight-%
	Y2O3	0.323	0.102	0.398	0.186	0.649	0.416	0.888	0.606	1.031	1.395	1.153	0.428
	SrO	1.087	0.376	0.671	1.073	0.99	1.04	0.231	0.759	0.783	0.215	0.125	0.339
	SiO2	0.131	0.152	0.085	0.087	0	0.573	0.179	0.034	0.03	0.222	0.214	0.07
	Al2O3	0.01	0.004	0	0.027	0.016	0.011	0.007	0.011	0.018	0.008	0	0
	Gd2O3	0.842	0.249	0.914	0.655	1.105	0.986	1.419	1.023	1.597	1.802	1.858	0.797
	Dy2O3	0.15	0	0.183	0.022	0.272	0.128	0.33	0.326	0.406	0.483	0.536	0.204
	Eu2O3	0.294	0	0.299	0.153	0.328	0.285	0.47	0.311	0.655	0.688	0.788	0.314
	FeO	0.091	0.064	0.029	0.039	0.113	0.076	0	0.313	0.197	0.006	0.013	0.108
	Sm2O3	1.538	0.778	1.606	1.414	1.507	1.58	2.681	1.59	2.737	3.246	3.724	2.052
	Nd2O3	10.746	9.717	11.354	11.107	10.602	11.255	17.194	11.39	13.557	17.853	19.186	14.867
	P2O5	28.214	28.678	28.593	28.539	28.585	27.741	28.656	28.658	29.751	29.842	28.976	29.596
	SO3	0.039	0	0.026	0.027	0.015	0.001	0.005	0.022	0.025	0.036	0.021	0.043
	K2O	0.014	0.005	0.005	0.014	0.013	0.008	0	0.007	0.015	0.014	0.007	0.006
	CaO	0.462	0.327	0.192	0.422	0.343	0.323	0.451	0.419	0.541	0.349	0.648	0.356
	Pr2O3	3.021	3.017	3.066	3.094	2.789	2.968	4.171	3.061	3.267	4.151	4.162	3.854
	Ce2O3	30.449	34.849	31.846	30.857	30.231	30.956	32.362	31.244	29.084	30.144	29.673	33.021
	La2O3	16.567	19.499	17.672	16.855	17.477	17.089	9.841	17.538	14.557	9.282	8.629	12.636
	As2O5	0	0	0	0.003	0	0	0	0	0	0	0	0
	UO2	0	0	0.002	0	0.002	0	0	0.001	0	0	0	0
	PbO	0.055	0.031	0.025	0.047	0.036	0.044	0.004	0.028	0.024	0.001	0	0.018
	ThO2	6.395	2.697	2.832	5.178	4.18	5.3	0.575	3.244	2.852	0.52	0.405	1.614
	Total	100.426	100.544	99.797	99.801	99.253	100.778	99.465	100.585	101.128	100.256	100.118	100.326
	Age (Ma)	203	269	212	216	203	198	169	205	203	66	1	268
	± 2SD	43	91	86	51	60	49	387	75	85	426	-11	145
	Sample	1457a-02	1457a-02	1457a-02	1457a-03	1457a-03	1457a-03	1457a-03	1457a-03	1457a-03	1457a-04	1457a-04	1457a-04
	crystal/spot	01_mnz_1	01_mnz_2	01_mnz_3	03_mnz_1	03_mnz_2	03_mnz_3	03_mnz_4	03_mnz_5	03_mnz_6	01_mnz_1	01_mnz_2	01_mnz_3
	Oxide weight-%
	Y2O3	0.302	0.145	0.146	0.377	0.086	0.36	0.729	0.479	0.785	0.314	0.683	0.154
	SrO	0.785	0.919	0.931	0.828	0.33	0.848	0.576	1.092	0.745	1.598	0.642	0.983
	SiO2	0.134	0.024	0.056	0.019	0.108	0.005	0.062	0.063	0.008	0	0.041	0.137
	Al2O3	0.009	0.004	0.01	0.013	0.004	0.009	0.007	0.003	0.03	0.016	0	0.023
	Gd2O3	0.775	0.477	0.507	1.101	0.346	0.903	1.22	1.197	1.191	0.775	1.272	0.721
	Dy2O3	0.137	0.051	0.049	0.192	0.002	0.159	0.299	0.22	0.39	0.171	0.267	0.06
	Eu2O3	0.23	0.118	0.139	0.496	0	0.442	0.433	0.351	0.342	0.253	0.413	0.166
	FeO	0.255	0.066	0.119	0.035	0.042	0.042	0	0.029	0.109	0.026	0	0.006
	Sm2O3	1.493	1.284	1.288	2.133	0.713	2.14	1.845	2.078	1.625	1.436	1.671	1.376
	Nd2O3	11.169	10.703	11.356	13.322	9.581	12.844	11.719	12.373	10.691	10.518	11.775	11.864
	P2O5	29.156	29.121	29.199	29.188	28.834	28.235	27.971	27.303	27.321	27.788	28.436	28.478
	SO3	0.034	0.044	0.052	0.047	0.03	0.027	0	0.029	0.011	0.038	0.004	0.002
	K2O	0.009	0	0.014	0.014	0.006	0.013	0.01	0.003	0.009	0.008	0.009	0.013
	CaO	0.413	0.384	0.36	0.338	0.463	0.285	0.14	0.376	0.29	0.493	0.148	0.393
	Pr2O3	3.075	3.078	3.181	3.345	2.993	3.371	2.958	3.06	3.009	2.846	3.194	3.24
	Ce2O3	29.876	30.905	31.034	30.685	34.833	30.852	30.875	29.428	30.508	29.433	31.177	30.996
	La2O3	17.497	17.239	17.052	14.895	19.498	15.422	17.035	14.59	17.662	16.223	16.927	15.777
	As2O5	0	0.003	0.003	0.089	0.078	0.075	0.091	0.078	0.081	0.014	0	0
	UO2	0	0.001	0	0.002	0.003	0	0	0.003	0.001	0.008	0	0.004
	PbO	0.039	0.055	0.036	0.036	0.025	0.025	0.021	0.04	0.026	0.057	0.02	0.048
	ThO2	4.126	5.06	3.92	3.569	2.738	3.306	2.502	4.803	2.807	6.486	2.833	5.317
	Total	99.513	99.681	99.453	100.722	100.736	99.363	98.495	97.61	97.641	98.499	99.512	99.757
	Age (Ma)	222	258	218	236	217	179	198	199	220	207	170	211
	± 2SD	57	53	64	70	87	73	95	53	86	42	84	50
	Table 1. Monazite-(Ce) EMP data (continued)
	Sample	1457a-04	1457a-04	1457a-04	1457a-04	1457a-04	1457a-04	1457a-04	1457a-04	1457a-04	1457a-04	1457a-05	1457a-05
	crystal/spot	01_mnz_4	01_mnz_5	01_mnz_6	01_mnz_7	01_mnz_8	01_mnz_9	01_mnz_10	01_mnz_11	01_mnz_12	01_mnz_13	01_mnz_1	01_mnz_2
	Oxide weight-%
	Y2O3	0.622	0.273	0.517	0.782	0.319	0.124	0.339	0.594	0.591	0.638	0.262	0.423
	SrO	0.943	1.174	0.709	0.693	1.109	0.429	1.215	0.907	1.125	0.93	0.983	0.571
	SiO2	0	0.083	0.038	0.005	0.26	0.155	0.008	0.012	0	0.01	0.361	0.559
	Al2O3	0.024	0.003	0.014	0.001	0.012	0.038	0.026	0	0.002	0.007	0.019	0.02
	Gd2O3	1.124	0.983	1.218	1.303	0.787	0.424	0.932	1.095	0.701	1.202	0.917	1.066
	Dy2O3	0.223	0.112	0.165	0.299	0.1	0	0.141	0.232	0.194	0.275	0.186	0.234
	Eu2O3	0.416	0.232	0.248	0.365	0.274	0	0.214	0.428	0.154	0.293	0.234	0.438
	FeO	0	0.044	0	0.047	0.066	0.034	0.009	0	0.009	0.034	0.373	0.605
	Sm2O3	1.861	1.627	1.523	1.638	1.208	0.784	1.521	1.635	1.087	1.677	1.642	2.02
	Nd2O3	11.687	11.614	11.48	11.478	10.898	10.719	10.898	11.702	9.544	11.718	11.345	12.306
	P2O5	28.878	28.546	29.009	29.327	28.703	28.89	28.739	29.254	29.028	28.86	28.854	28.904
	SO3	0.028	0.012	0.005	0	0.024	0.061	0.044	0.009	0.012	0.023	0.013	0.038
	K2O	0.003	0.007	0.005	0.001	0.007	0.012	0.007	0.008	0.014	0.002	0.004	0.009
	CaO	0.236	0.442	0.158	0.185	0.319	0.381	0.362	0.201	0.626	0.263	0.865	0.895
	Pr2O3	3.136	3.051	3.027	3	3.038	3.274	3.088	3.077	2.769	2.991	3.163	3.284
	Ce2O3	30.197	30.285	31.262	30.993	29.418	32.942	29.493	30.714	30.291	30.296	30.372	29.351
	La2O3	16.415	15.604	17.641	17.398	17.067	18.344	16.639	16.566	19.173	16.607	16.118	15.163
	As2O5	0	0	0	0	0	0	0	0	0	0	0	0
	UO2	0	0	0.005	0.003	0.005	0.004	0.001	0	0	0.003	0	0
	PbO	0.04	0.052	0.029	0.024	0.05	0.025	0.052	0.034	0.038	0.037	0.034	0.034
	ThO2	3.996	5.85	2.763	2.458	6.201	2.885	5.918	3.595	4.247	4.098	3.307	3.685
	Total	99.827	99.992	99.815	100.001	99.865	99.522	99.645	100.063	99.606	99.962	99.051	99.604
	Age (Ma)	234	210	245	228	189	203	206	221	210	215	247	217
	± 2SD	64	46	88	98	43	83	45	70	60	62	75	68
	Sample	1457a-05	1457a-06	1457a-06	1457a-06	1457a-06	1457a-07	1457a-07	1457a-07	1457a-07	1457a-07	1457a-07	1457a-07
	crystal/spot	01_mnz_3	01_mnz_1	01_mnz_2	01_mnz_3	01_mnz_4	02_mnz_1	02_mnz_2	02_mnz_3	02_mnz_4	02_mnz_5	02_mnz_6	02_mnz_7
	Oxide weight-%
	Y2O3	0.327	0.571	0.323	0.333	0.378	0.147	0.101	0.213	0.556	0.146	0.378	0.386
	SrO	0.745	0.921	1.418	0.834	0.816	1.261	0.354	1.333	0.636	1.104	1.62	1.734
	SiO2	0.103	0	0	0.004	0	0.2	0.148	0.236	0.132	0.101	0	0
	Al2O3	0.015	0	0.009	0.01	0.01	0.018	0.007	0	0.01	0.019	0.011	0.025
	Gd2O3	0.741	1.019	0.671	1.109	0.914	0.632	0.326	0.635	1.02	0.64	0.862	0.819
	Dy2O3	0.14	0.216	0.104	0.183	0.124	0.081	0	0.118	0.157	0.048	0.134	0.173
	Eu2O3	0.207	0.292	0.227	0.275	0.272	0.157	0	0.227	0.305	0.05	0.274	0.345
	FeO	0.082	0.034	0.125	0.05	0.029	0.069	0.03	0.143	0	0	0	0.022
	Sm2O3	1.298	1.582	1.192	2.065	1.477	1.57	0.824	1.492	1.39	1.259	1.586	1.643
	Nd2O3	11.009	10.931	10.071	13.017	11.294	11.287	9.978	10.862	10.899	11.181	10.469	10.517
	P2O5	29.264	28.906	28.574	28.87	28.565	29.094	29.71	28.82	29.165	28.992	28.885	28.652
	SO3	0.056	0	0.009	0.032	0.004	0	0.024	0.028	0.036	0.03	0.012	0.025
	K2O	0	0	0.012	0.005	0	0.007	0.01	0	0.003	0.01	0	0.009
	CaO	0.281	0.188	0.441	0.273	0.211	0.536	0.386	0.62	0.165	0.474	0.451	0.51
	Pr2O3	3.132	2.989	2.926	3.198	3.028	3.074	3.226	2.906	3.017	3.004	2.726	2.945
	Ce2O3	31.643	31.284	30.664	30.825	31.691	28.145	32.579	29.151	30.565	30.76	29.074	28.46
	La2O3	17.792	18.127	17.359	15.102	17.218	15.761	19.194	15.761	18.383	16.353	16.743	15.871
	As2O5	0.003	0	0	0	0	0	0	0	0	0	0	0.009
	UO2	0.007	0.003	0	0	0.003	0.006	0	0	0	0.002	0.007	0
	PbO	0.031	0.027	0.052	0.027	0.035	0.067	0.032	0.067	0.023	0.051	0.065	0.064
	ThO2	3.349	3.168	5.634	3.546	3.609	7.352	2.897	7.061	2.775	5.554	6.659	7.312
	Total	100.226	100.259	99.812	99.756	99.678	99.463	99.825	99.673	99.237	99.777	99.956	99.522
	Age (Ma)	220	199	220	180	227	216	265	225	199	216	229	208
	± 2SD	73	77	48	72	69	38	80	36	87	48	42	38
	Table 1. Monazite-(Ce) EMP data (continued)
	Sample	1457a-07	1457a-07	1457a-07	1457a-07	1457a-07	1457a-07	1457a-07	1457b-01	1457b-01	1457b-01	1457b-01	1457b-01
	crystal/spot	02_mnz_8	02_mnz_9	02_mnz_10	04_mnz_1	04_mnz_2	04_mnz_3	04_mnz_4	01_mnz_1	01_mnz_2	01_mnz_3	01_mnz_4	01_mnz_5
	Oxide weight-%
	Y2O3	0.426	0.131	0.126	0.166	0.284	0.199	0.215	0.263	0.213	0.658	0.38	0.061
	SrO	0.96	1.128	0.683	0.848	1.043	0.751	0.949	0.549	0.527	0.98	0.789	0.454
	SiO2	0.049	0.151	0.226	0.158	0.243	0.102	0.09	0.07	0.092	0.002	0.016	0.082
	Al2O3	0.015	0.017	0.012	0.019	0.018	0.029	0.003	0.016	0.029	0.018	0.013	0.007
	Gd2O3	0.839	0.498	0.557	0.661	0.746	0.412	0.729	0.617	0.492	1.141	0.896	0.266
	Dy2O3	0.185	0	0.009	0.119	0.175	0.016	0.086	0.104	0.014	0.264	0.136	0
	Eu2O3	0.228	0.111	0.109	0.158	0.223	0.047	0.234	0.202	0.103	0.415	0.291	0
	FeO	0	0.009	0.032	0.141	0.296	0.13	0.234	0	0	0	0	0.036
	Sm2O3	1.408	1.049	1.051	1.222	1.533	1.077	1.437	1.114	0.929	1.705	1.49	0.67
	Nd2O3	10.512	10.147	10.944	10.754	11.268	10.38	11.231	10.527	10.047	11.615	11.474	8.056
	P2O5	29.045	28.519	28.788	28.986	27.34	28.626	28.337	27.762	27.738	28.469	27.767	27.725
	SO3	0.022	0	0.045	0.031	0.059	0.023	0	0.02	0.025	0.016	0.008	0.015
	K2O	0.017	0.004	0.005	0.018	0.003	0.015	0.013	0.008	0.008	0.003	0.009	0.01
	CaO	0.197	0.392	0.296	0.488	0.855	0.54	0.791	0.272	0.273	0.231	0.258	0.313
	Pr2O3	2.88	2.862	3.269	3.189	3.026	3.007	3.126	3.026	3.045	3.137	3.088	2.613
	Ce2O3	30.734	31.169	32.084	32.134	29.405	32.726	30.977	33.296	33.566	31.024	31.365	33.282
	La2O3	19.111	16.873	17.435	16.982	15.253	17.084	15.932	17.952	18.62	16.345	17.272	22.68
	As2O5	0	0	0	0	0	0	0	0	0.027	0	0	0
	UO2	0	0.006	0	0	0.005	0.001	0	0	0.007	0.003	0.004	0.004
	PbO	0.035	0.058	0.038	0.032	0.058	0.041	0.056	0.025	0.028	0.035	0.03	0.028
	ThO2	3.164	6.025	3.947	3.624	6.348	4.947	5.71	2.9	2.953	3.685	3.607	3.013
	Total	99.827	99.149	99.656	99.729	98.179	100.154	100.149	98.725	98.733	99.748	98.894	99.316
	Age (Ma)	264	228	225	209	217	199	231	202	220	227	194	222
	± 2SD	74	45	60	65	39	48	43	83	82	69	68	81
	Sample	1457b-01	1457b-01	1457b-01	1457b-01	1457b-01	1457b-01	1457b-01	1457b-01	1457b-01	1457b-01	1457b-02	1457b-02
	crystal/spot	01_mnz_6	01_mnz_7	01_mnz_8	01_mnz_9	01_mnz_10	01_mnz_11	01_mnz_12	02_mnz_1	02_mnz_2	02_mnz_3	01_mnz_1	01_mnz_2
	Oxide weight-%
	Y2O3	0.119	0.319	0.288	0.211	0.148	0.175	0.701	0.224585	0.377	1.435	0.288	0.273
	SrO	0.351	0.909	1.064	0.883	0.822	1.245	0.668	0.953256	1.124	0.199	0.933	0.965
	SiO2	0.154	0.066	0.023	0.052	0.039	0.015	0.035	0.0747693	0	0.135	0.148	0.143
	Al2O3	0.01	0.005	0.005	0.002	0.008	0.005	0.018	0.0134898	0.013	0	0	0.007
	Gd2O3	0.338	0.766	0.681	0.467	0.598	0.543	1.141	0.619588	0.651	2.324	0.635	0.687
	Dy2O3	0.054	0.095	0.111	0.014	0.097	0.056	0.262	0.0770326	0.084	0.572	0.083	0.074
	Eu2O3	0.065	0.169	0.132	0.188	0.159	0.122	0.293	0.145608	0.147	0.722	0.266	0.117
	FeO	0	0.019	0	0.003	0.001	0.025	0	0.0424898	0.131	0.368	0	0.015
	Sm2O3	0.938	1.33	1.297	1.1	1.253	1.127	1.743	1.13889	1.173	3.04	1.394	1.405
	Nd2O3	9.841	10.507	9.83	10.153	11.665	9.939	11.406	10.0889	10.404	16.316	11.549	11.297
	P2O5	28.517	28.088	28.339	28.187	28.36	28.381	28.604	28.4152	29.54	28.925	28.756	28.671
	SO3	0.056	0.041	0.027	0.024	0.017	0.006	0.009	0.0221981	0.042	0.019	0.015	0.007
	K2O	0.006	0.002	0.008	0	0.007	0.005	0.017	0.00665672	0.006	0.012	0.013	0
	CaO	0.206	0.357	0.396	0.55	0.234	0.417	0.144	0.38687	0.582	0.858	0.466	0.442
	Pr2O3	2.929	2.863	2.781	3.012	3.181	2.948	3.102	2.91979	2.879	3.748	2.996	2.91
	Ce2O3	33.557	31.462	31.553	32.342	32.449	31.69	30.732	31.4202	30.865	30.1	30.677	30.746
	La2O3	20.089	18.175	17.944	16.804	16.856	17.214	17.363	18.0473	17.938	11.001	15.164	15.96
	As2O5	0	0.042	0	0	0	0	0	0.000644505	0	0	0	0.014
	UO2	0.001	0.001	0.002	0.003	0.008	0.006	0	0.0032076	0	0	0.002	0.008
	PbO	0.022	0.041	0.05	0.047	0.028	0.044	0.02	0.0424396	0.037	0.008	0.049	0.052
	ThO2	2.264	4.656	5.196	5.88	3.658	5.579	2.628	4.224	4.285	0.957	5.914	5.614
	Total	99.517	99.915	99.724	99.921	99.588	99.542	98.885	100.438	100.277	100.739	99.348	99.407
	Age (Ma)	227	210	226	187	183	185	184	193	203	208	198	217
	± 2SD	105	55	51	45	67	47	91	60	58	239	45	48
	Table 1. Monazite-(Ce) EMP data (continued)
	Sample	1457b-02	1457b-02	1457b-02	1457b-02	1457b-02	1457b-02	1457b-02	1457b-02	1457b-03	1457b-03	1457b-03	1457b-03
	crystal/spot	01_mnz_3	01_mnz_4	01_mnz_5	01_mnz_6	01_mnz_7	01_mnz_8	01_mnz_9	01_mnz_10	02-mnz_1	02-mnz_2	02-mnz_3	02-mnz_4
	Oxide weight-%
	Y2O3	0.43	0.282	0.144	0.623	0.41	0.385	0.601	0.411	0.531	1.417	0.508	1.118
	SrO	0.77	0.768	0.516	0.813	1.33	1.224	0.985	1.052	0.107	0.203	0.132	0.176
	SiO2	0.05	0.056	0.075	0.004	0	0	0	0	0.17	0.135	0.146	0.141
	Al2O3	0.025	0.009	0.009	0.015	0.019	0.018	0.007	0.015	0.002	0.029	0.016	0.013
	Gd2O3	1.156	0.834	0.404	1.241	0.948	0.893	1.137	1.039	2.223	3.037	2.193	2.193
	Dy2O3	0.214	0.101	0	0.216	0.163	0.137	0.284	0.157	0.256	0.613	0.293	0.457
	Eu2O3	0.326	0.175	0	0.276	0.244	0.272	0.328	0.312	0.896	1.184	0.787	0.862
	FeO	0	0.009	0.002	0	0.005	0.03	0	0	0	0	0	0
	Sm2O3	1.521	1.363	0.684	1.62	1.535	1.387	1.737	1.733	4.37	5.283	4.415	4.065
	Nd2O3	11.505	11.119	9.13	11.287	11.079	10.759	11.404	12.387	19.004	19.711	19.423	19.827
	P2O5	28.976	28.861	28.774	28.713	28.488	28.297	29.131	28.707	30.073	30.476	30.21	30.522
	SO3	0.003	0.028	0.022	0.015	0.018	0.014	0.029	0	0.041	0.025	0.024	0.023
	K2O	0.001	0.001	0.005	0.015	0.006	0	0	0.011	0.017	0.017	0.004	0.012
	CaO	0.221	0.333	0.326	0.165	0.338	0.327	0.196	0.375	0.526	0.428	0.259	0.574
	Pr2O3	3.097	3.18	2.836	3.181	2.964	3.001	3.064	3.269	3.983	4.012	4.011	4.334
	Ce2O3	31.122	32.027	34.067	31.225	30.052	30.47	30.212	29.597	28.055	24.909	27.804	27.765
	La2O3	16.73	16.763	19.192	17.778	16.542	17.095	17.645	14.746	9.373	7.327	9.136	7.57
	As2O5	0	0	0.005	0	0	0.023	0	0.027	0.025	0	0	0
	UO2	0.002	0.006	0	0	0.003	0	0.002	0.011	0	0	0	0
	PbO	0.028	0.038	0.027	0.03	0.049	0.044	0.027	0.047	0.009	0.003	0.002	0
	ThO2	3.464	3.797	3.26	2.895	5.064	5.173	2.997	5.036	0.285	0.513	0.393	0.321
	Total	99.641	99.751	99.478	100.113	99.255	99.548	99.786	98.932	99.944	99.324	99.755	99.974
	Age (Ma)	190	239	198	245	227	200	215	220	717	150	99	31
	± 2SD	71	67	75	85	52	50	81	52	793	439	569	691
	Sample	1457b-03	1457b-03	1457b-03	1457b-03	1457b-04	1457b-04	1457b-04	1457b-04	1457b-04	1457b-04	1457b-04	1457b-04	1457b-04
	crystal/spot	02-mnz_5	02-mnz_6	02-mnz_7	02-mnz_8	01_mnz_1	01_mnz_1	01_mnz_3	01_mnz_4	01_mnz_5	01_mnz_6	01_mnz_7	01_mnz_8	01_mnz_9
	Oxide weight-%
	Y2O3	0.26	0.262	0.205	1.576	0.395	2.425	0.477	0.141	0.238	0.07	0.089	0.091	0.151
	SrO	0.545	0.857	0.748	0.099	0.336	0.315	1.001	0.478	0.969	0.344	0.433	0.629	0.759
	SiO2	0.078	0.121	0.125	0.187	0.087	0.086	0	0.096	0.073	0.083	0.071	0.041	0.087
	Al2O3	0.003	0.01	0.017	0.008	0.017	0.002	0	0.018	0.01	0.019	0.024	0.012	0.014
	Gd2O3	0.608	0.66	0.519	3.342	1.62	1.964	0.822	0.458	0.542	0.24	0.337	0.327	0.411
	Dy2O3	0.126	0.072	0.119	0.632	0.155	0.758	0.162	0.035	0.093	0	0.032	0.02	0.064
	Eu2O3	0.102	0.198	0.162	1.202	0.511	0.696	0.12	0.009	0.024	0	0	0	0.182
	FeO	0.168	0.163	0.11	0.061	0	0.001	0.055	0	0.073	0	0	0	0.027
	Sm2O3	1.192	1.288	1.14	5.239	2.904	3.013	1.388	1.013	1.071	0.728	0.562	0.757	1.107
	Nd2O3	10.628	10.76	10.26	20.533	15.027	15.928	11.054	10.741	10.368	9.897	7.892	9.653	10.823
	P2O5	29.257	28.962	28.865	29.61	29.45	29.58	28.748	28.956	28.418	28.818	28.714	28.878	28.587
	SO3	0.02	0.026	0.028	0.03	0.031	0.019	0.024	0.024	0.005	0.028	0.022	0.031	0.035
	K2O	0.002	0.009	0	0.01	0.016	0.014	0.027	0.013	0.006	0	0.008	0.006	0.015
	CaO	0.359	0.644	0.59	0.242	0.133	0.301	0.442	0.339	0.496	0.256	0.261	0.404	0.328
	Pr2O3	3.084	3.122	2.968	4.041	3.574	3.806	2.818	3.098	3.033	3.084	2.477	2.955	3.03
	Ce2O3	31.885	30.941	30.941	24.968	30.54	29.68	30.817	33.088	31.715	34.46	33.597	33.967	32.826
	La2O3	18.395	16.29	17.284	6.926	13.817	10.06	17.259	18.159	17.131	19.207	23.01	18.448	17.653
	As2O5	0	0	0	0	0	0	0	0	0	0	0	0	0
	UO2	0	0	0	0	0	0	0	0	0	0	0	0	0
	PbO	0.021	0.043	0.038	0.001	0.002	0	0.033	0.028	0.046	0.017	0.023	0.035	0.037
	ThO2	2.68	4.874	4.465	0.416	1.275	0.745	3.865	3.049	5.185	2.143	2.548	3.683	3.871
	Total	99.411	99.3	98.584	99.122	99.892	99.394	99.113	99.743	99.496	99.393	100.1	99.938	100.008
	Age (Ma)	183	208	201	38	44	0	205	218	211	183	218	228	224
	± 2SD	91	53	57	539	176	-113	65	80	51	110	95	65	64
